# Supplementary material for: Phosphorus recovery as ferrous phosphate (vivianite) from wastewater produced in manufacture of thin film transistor-liquid crystal displays (TFT-LCD) by a fluidized bed crystallizer (FBC)
Source: Royal Society of Chemistry journal article supplement (doi:10.1039/c7ra06308c), 2017-01-01
Supplement: c7ra06308c1.pdf [file c7ra06308c1.pdf]

### Supplementary

#### Solubility approximation of vivanite, ferrous phosphate octahydrate

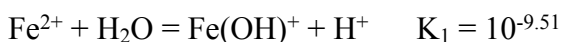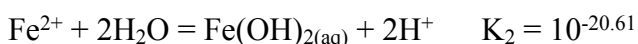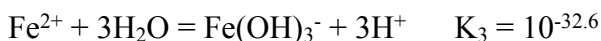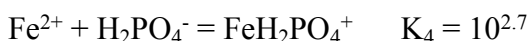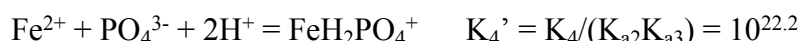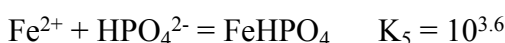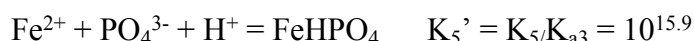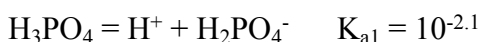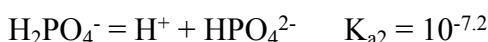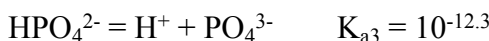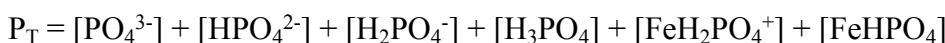

$$= [\text{PO}_4^{3-}] \left( 1 + \frac{[\text{H}^+]}{K_{a3}} + \frac{[\text{H}^+]^2}{K_{a2}K_{a3}} + \frac{[\text{H}^+]^3}{K_{a1}K_{a2}K_{a3}} \right) + [\text{Fe}^{2+}][\text{PO}_4^{3-}] (K_4'[\text{H}^+]^2 + K_5'[\text{H}^+])$$

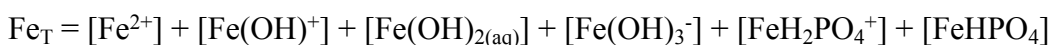

$$= [\text{Fe}^{2+}] \left( 1 + \frac{K_1}{[\text{H}^+]} + \frac{K_2}{[\text{H}^+]^2} + \frac{K_3}{[\text{H}^+]^3} \right) + [\text{Fe}^{2+}][\text{PO}_4^{3-}] (K_4'[\text{H}^+]^2 + K_5'[\text{H}^+])$$

#### Solubility of vivianite

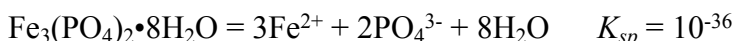

Since,

$$K_{sp} = [\text{Fe}^{2+}]^3 \times [\text{PO}_4^{3-}]^2 = 10^{-36}$$

$$[\text{Fe}^{2+}] [\text{Fe}^{2+}]^2 \times [\text{PO}_4^{3-}]^2 = 10^{-36}$$

$$[\text{Fe}^{2+}]^{1/2} ([\text{Fe}^{2+}] \times [\text{PO}_4^{3-}]) = 10^{-18}$$

$$[\text{Fe}^{2+}] \times [\text{PO}_4^{3-}] = 10^{-18} [\text{Fe}^{2+}]^{-1/2}$$

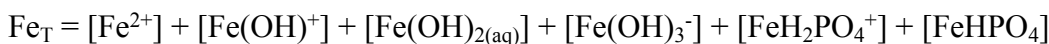

$$= [\text{Fe}^{2+}] \left( 1 + \frac{K_1}{[\text{H}^+]} + \frac{K_2}{[\text{H}^+]^2} + \frac{K_3}{[\text{H}^+]^3} \right) + [\text{Fe}^{2+}]^{-1/2} 10^{-18} (K_4'[\text{H}^+]^2 + K_5'[\text{H}^+])$$

Assume  $\text{Fe}_T = 10^{-3} \text{ M}$

$$\alpha x + \beta x^{-1/2} - 10^{-3} = 0$$

$$\alpha = 1 + \frac{K_1}{[H^+]} + \frac{K_2}{[H^+]^2} + \frac{K_3}{[H^+]^3}$$

$$\beta = 10^{-18} (K_4' [H^+]^2 + K_5' [H^+])$$

$$\text{Solve } x = [Fe^{2+}]$$

$$[PO_4^{3-}] = \left( \frac{10^{-36}}{[Fe^{2+}]^3} \right)^{1/2}$$

$$[HPO_4^{2-}] = \frac{[H^+]}{10^{-12.3}} [PO_4^{3-}]$$

$$[H_2PO_4^-] = \frac{[H^+]^2}{10^{-12.3} \times 10^{-7.2}} [PO_4^{3-}]$$

$$[H_3PO_4] = \frac{[H^+]^3}{10^{-12.3} \times 10^{-7.2} \times 10^{-2.1}} [PO_4^{3-}]$$

$$[FeH_2PO_4^+] = 10^{22.2} \times [Fe^{2+}] [PO_4^{3-}] [H^+]^2$$

$$[FeHPO_4] = 10^{15.9} \times [Fe^{2+}] [PO_4^{3-}] [H^+]$$

Solubility ferrous hydroxide

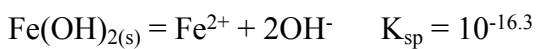

$$[Fe^{2+}] = \frac{K_{sp} [H^+]^2}{K_w^2}$$

$$\begin{aligned} Fe_T &= [Fe^{2+}] \left( 1 + \frac{K_1}{[H^+]} + \frac{K_2}{[H^+]^2} + \frac{K_3}{[H^+]^3} \right) + [Fe^{2+}] [PO_4^{3-}] (K_4' [H^+]^2 + K_5' [H^+]) \\ &= [Fe^{2+}] \alpha + [Fe^{2+}]^{-1/2} \beta \end{aligned}$$

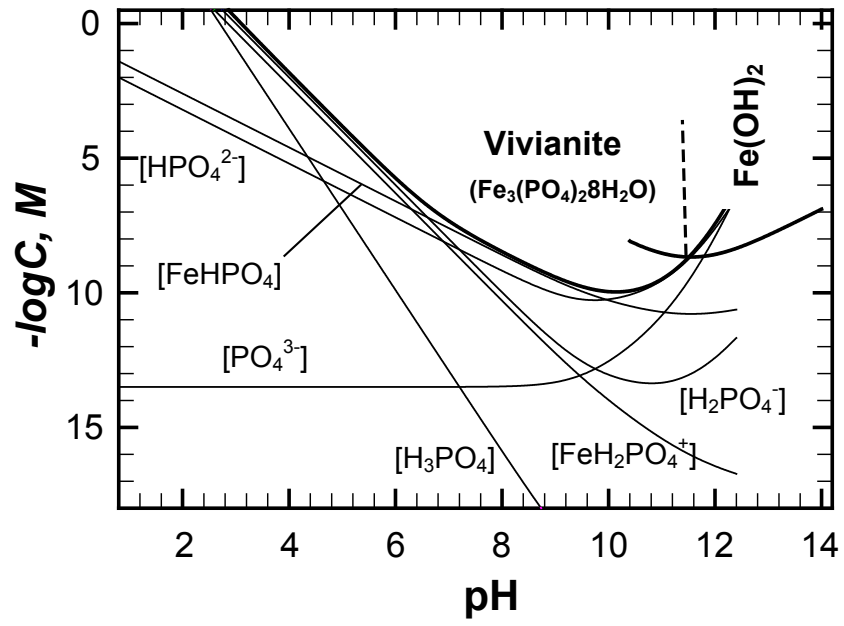

**Fig. S1** Speciation of soluble phosphate contributing to precipitation of vivianite ( $\text{Fe}_T = 10^{-3} \text{ M}$ )

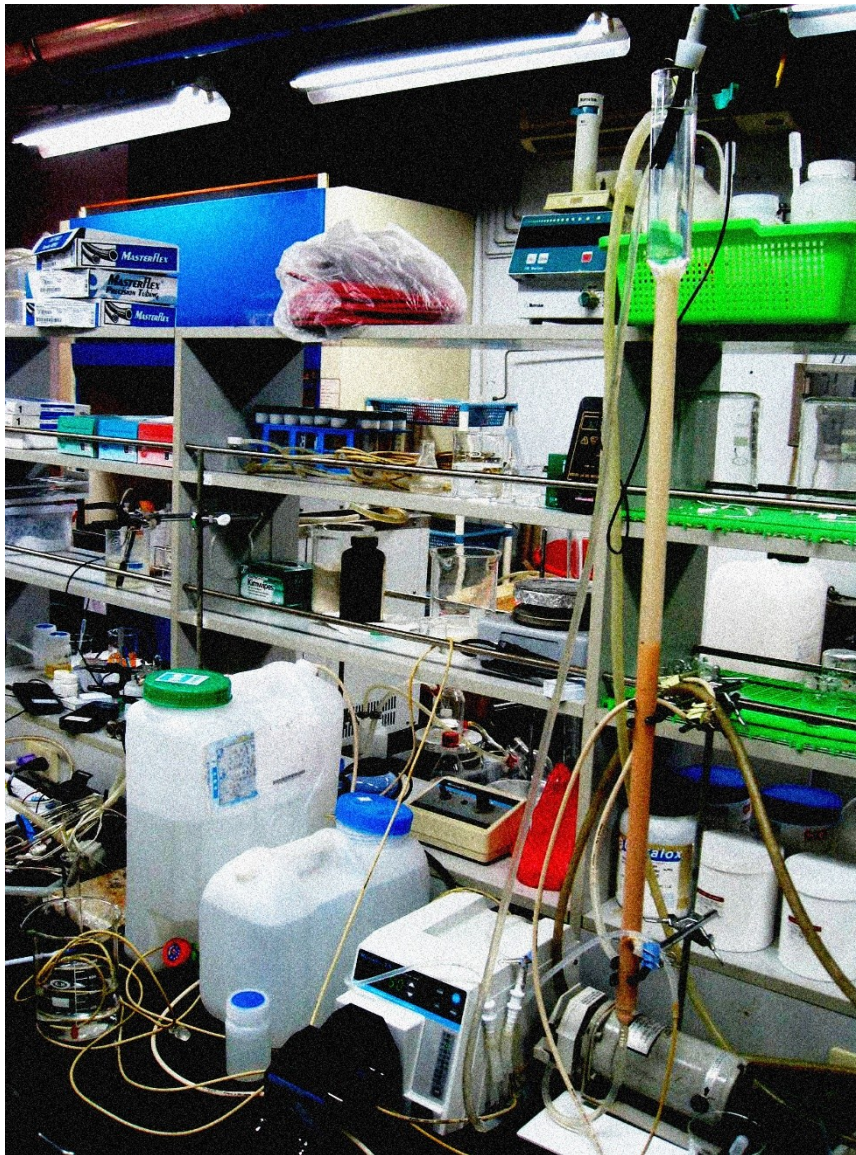

Fig. S2 Apparatus of fluidized-bed reactor

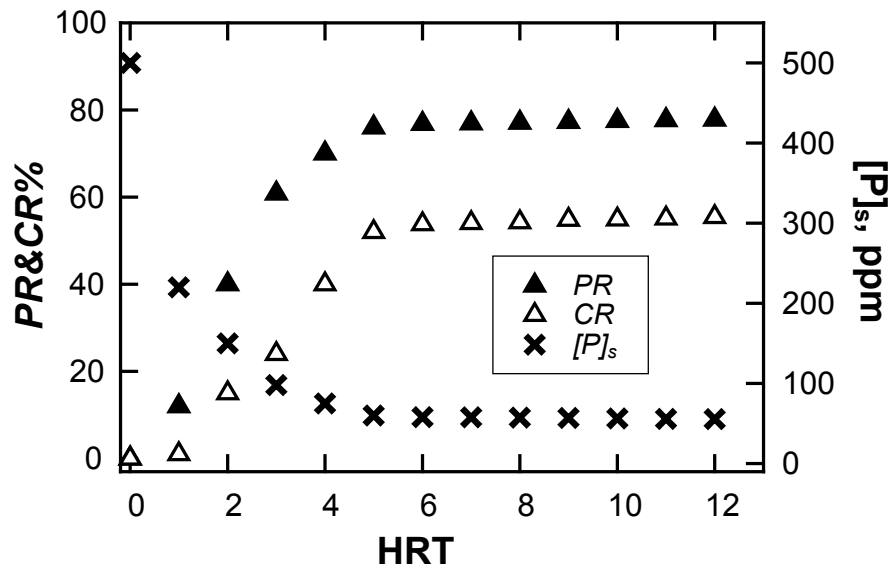

Fig. S3 The efficiency of phosphate removal (PR), crystallization ratio (CR) and the soluble  $[P]_s$  in the effluent from a FBC reactor by creating vivianite (ferrous phosphate) pellets. ( $[Fe]/[P] = 1.5$ ,  $U = 40 \text{ m h}^{-1}$ , pH 5.5)

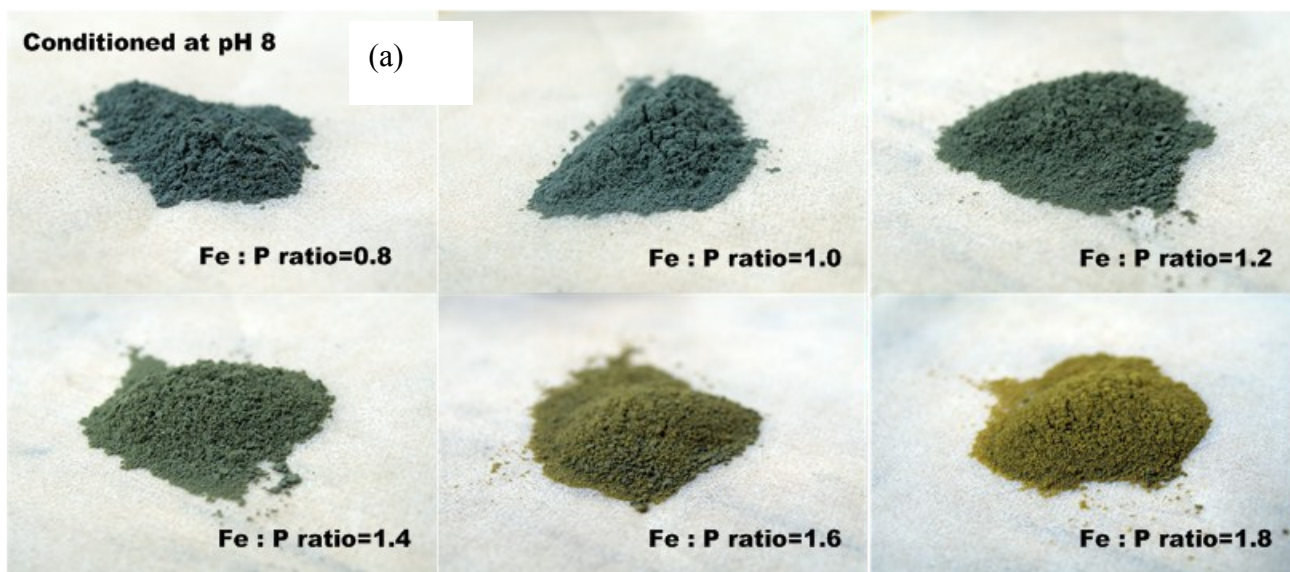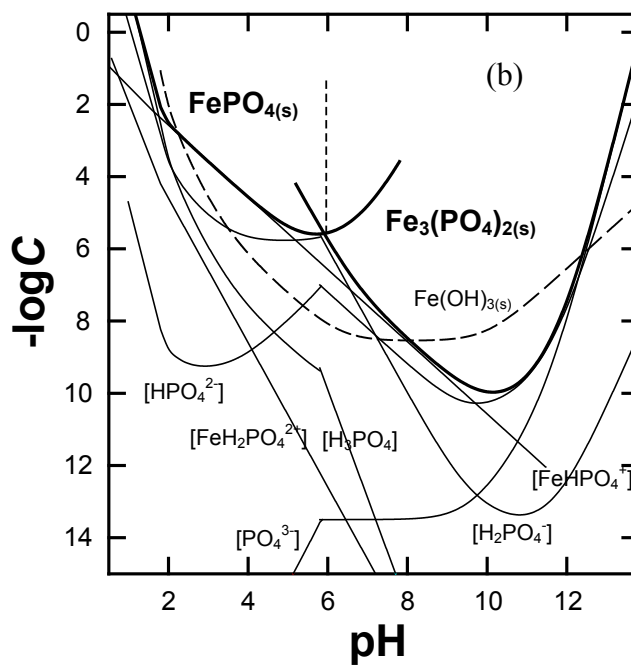

**Fig. S4** (a) Ferrous phosphate sludge of jar test at different molar ratio of Fe(II) to P. (b) Solubility of  $\text{FePO}_4$ , vivianite and  $\text{Fe}(\text{OH})_3$ .

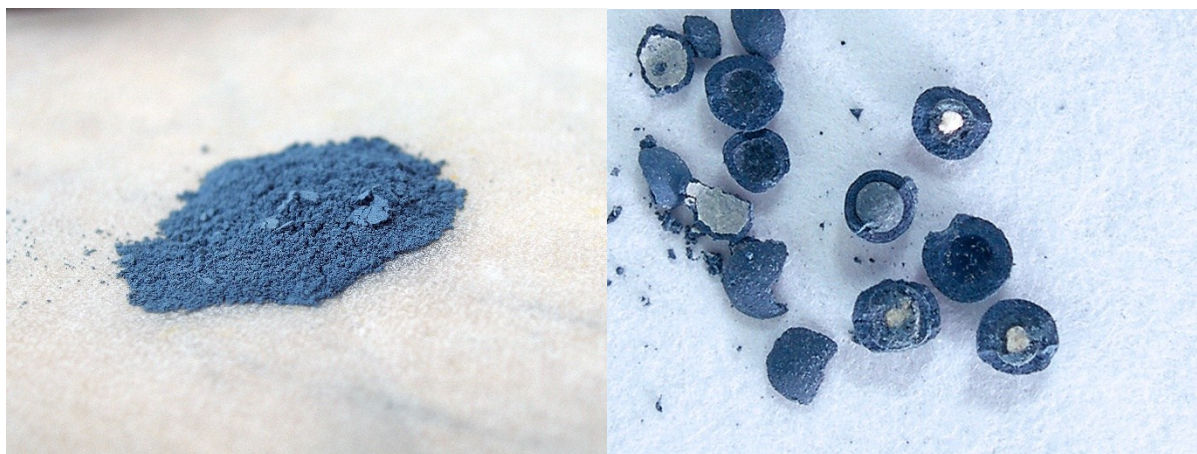

**Fig. S5** Products of vivianite sludge and crystal pellets from jar test and FBC reactor, respectively.

Table S1 The iron concentrations in the filtered and unfiltered samplings under various FBC conditions

| pH   | Iron conc. (ppm) |            | Upflow (m/h) | Iron conc. (ppm) |            | Fe(II)/P | Iron conc. (ppm) |            |
|------|------------------|------------|--------------|------------------|------------|----------|------------------|------------|
|      | filtered         | unfiltered |              | filtered         | unfiltered |          | filtered         | unfiltered |
| 4.79 | 95.23            | 126.99     | 11.46        | 135              | 154        | 1        | 36               | 41         |
| 5.12 | 67.24            | 94.57      | 21.01        | 101              | 121        | 1.2      | 48               | 50         |
| 5.2  | 51.75            | 72.95      | 30.56        | 78               | 89         | 1.5      | 55               | 61         |
| 5.37 | 32.75            | 52.01      | 40.11        | 78               | 89         | 1.75     | 78               | 89         |
| 5.48 | 28.25            | 50.12      | 49.66        | 68               | 78         | 2        | 203              | 218        |
| 5.58 | 10.45            | 25.47      | 59.21        | 65               | 76         | 2.25     | 280              | 295        |
| 5.72 | 9.43             | 17.77      |              |                  |            | 2.5      | 382              | 401        |
| 5.85 | 5.24             | 9.93       |              |                  |            |          |                  |            |
| 6.02 | 3.64             | 5.94       |              |                  |            |          |                  |            |
| 6.25 | 1.25             | 2.09       |              |                  |            |          |                  |            |
| 6.5  | 0.975            | 1.82       |              |                  |            |          |                  |            |
| 6.8  | 0.633            | 1.15       |              |                  |            |          |                  |            |
| 7.3  | 0.32             | 0.59       |              |                  |            |          |                  |            |
| 7.52 | 0.19             | 0.57       |              |                  |            |          |                  |            |

Table S2 The other elements measure in the ICP

| ICP other elements |                 |               |               |                |
|--------------------|-----------------|---------------|---------------|----------------|
| Ag (Silver)        | Al ( Aluminium) | B (Boron)     | Ba (Barium)   | Bi (Bismuth)   |
| Ca (Calcium)       | Cd (Cadmium)    | Co ( Cobalt)  | Cr (Chromium) | Cu (Copper)    |
| Ga (Gallium)       | In (indium)     | K (Potassium) | Li (Lithium)  | Mg (Magnesium) |
| Mn (Mangenesese)   | Na (Natrium)    | Ni (Nickel)   | Pb (Lead)     | Sr (strontium) |
| Ti (Titanium)      | Zn (Zinc)       |               |               |                |
